# Supplementary material for: Terroir Is the Main Driver of the Epiphytic Bacterial and Fungal Communities of Mango Carposphere in Reunion Island
Source: Front Microbiol. 2021 Jan 20;11:619226. doi: 10.3389/fmicb.2020.619226 (PMC7874004; doi:10.3389/fmicb.2020.619226)
Supplement: Supplementary Data 4 — Differential abundance analysis (DESeq2) of fungal ASVs applied to different factors, including plot, cultivar, harvest date, and fruit parts. [file Table_4.XLSX]

## Sheet: DESeq2_ITS
								Plot(St-Pierre vs St-Gilles)			Cultivars (cv. José vs cv. Cogshall)			Fruit parts (PE vs SE)			Harvest (H3vsH4)			Harvest(H1 vs H2)
ASV	Kingdom	Phylum	Class	Order	Family	Genus	Species	log2FoldChange	lfcSE	padj	log2FoldChange	lfcSE	padj	log2FoldChange	lfcSE	padj	log2FoldChange	lfcSE	padj	log2FoldChange	lfcSE	padj
ASV10	Fungi	Ascomycota	Dothideomycetes	Dothideales	Aureobasidiaceae	Aureobasidium	Aureobasidium_pullulans	2.8547	0.375366	1.02297e-12	3.51824	0.945693	0.00388426
ASV102	Fungi	Ascomycota	Dothideomycetes	Pleosporales	Didymellaceae	Ascochyta	Ascochyta_manawaorae	1.21588	0.317973	0.000449677
ASV105	Fungi	Basidiomycota	Exobasidiomycetes	Microstromatales	Microstromatales_fam_Incertae_sedis	Sympodiomycopsis	Sympodiomycopsis_paphiopedili	-5.40386	0.57347	6.38675e-19
ASV106	Fungi	Basidiomycota	Tremellomycetes	Tremellales	Bulleribasidiaceae	Vishniacozyma	NA	-3.24588	0.490269	5.14212e-10
ASV107	Fungi	Ascomycota	Sordariomycetes	Trichosphaeriales	Trichosphaeriaceae	Nigrospora	Nigrospora_oryzae	2.0572	0.461882	3.72901e-05							-2.0411	0.586884	0.00795589
ASV108	Fungi	Ascomycota	Dothideomycetes	Capnodiales	Mycosphaerellaceae	NA	NA	4.78712	0.740217	1.30472e-09
ASV11	Fungi	Ascomycota	Dothideomycetes	Dothideales	Aureobasidiaceae	Aureobasidium	Aureobasidium_thailandense	4.01999	0.549659	5.75171e-12
ASV110	Fungi	Ascomycota	Sordariomycetes	Trichosphaeriales	Trichosphaeriaceae	Nigrospora	Nigrospora_oryzae	1.62596	0.382177	8.48954e-05
ASV111	Fungi	Basidiomycota	Exobasidiomycetes	Microstromatales	Microstromatales_fam_Incertae_sedis	Jaminaea	NA	4.89905	0.607325	3.19709e-14
ASV112	Fungi	Ascomycota	Sordariomycetes	Hypocreales	Nectriaceae	Gibberella	Gibberella_intricans	-1.27992	0.350382	0.000828251
ASV113	Fungi	Ascomycota	Dothideomycetes	Pleosporales	Pleosporaceae	Curvularia	Curvularia_americana	-1.80326	0.393057	2.11147e-05
ASV114	Fungi	Ascomycota	Dothideomycetes	Capnodiales	Cladosporiaceae	Cladosporium	NA	-4.82545	0.582884	6.51627e-15				2.89396	0.691941	0.000816384
ASV115	Fungi	Ascomycota	Dothideomycetes	Pleosporales	Pleosporaceae	Curvularia	Curvularia_sorghina	-1.60034	0.380971	0.000105522
ASV117	Fungi	Ascomycota	Dothideomycetes	Pleosporales	Didymellaceae	NA	NA	3.24325	0.553214	4.44236e-08
ASV119	Fungi	Ascomycota	Dothideomycetes	Pleosporales	Pleosporaceae	Curvularia	Curvularia_lunata	-3.23148	0.692639	1.51328e-05										-3.28625	0.91271	0.00816118
ASV12	Fungi	Basidiomycota	Tremellomycetes	Filobasidiales	Filobasidiaceae	Filobasidium	Filobasidium_magnum	2.46547	0.772433	0.00394624
ASV125	Fungi	Ascomycota	Dothideomycetes	Capnodiales	Mycosphaerellaceae	NA	NA	-2.38191	0.325198	5.51477e-12
ASV126	Fungi	Ascomycota	Dothideomycetes	Capnodiales	Mycosphaerellaceae	Phaeophleospora	NA				-5.08402	1.41556	0.00486062
ASV129	Fungi	Ascomycota	Dothideomycetes	Capnodiales	Capnodiales_fam_Incertae_sedis	Sporidesmajora	Sporidesmajora_pennsylvaniensis	3.47709	0.685241	2.33004e-06
ASV13	Fungi	Ascomycota	Sordariomycetes	Trichosphaeriales	Trichosphaeriaceae	Nigrospora	NA	-1.08675	0.289784	0.000580585				-1.99224	0.434869	0.000185706
ASV130	Fungi	Ascomycota	Sordariomycetes	Hypocreales	Stachybotryaceae	Stachybotrys	NA	-2.98952	0.400317	2.23161e-12										-2.57491	0.421008	2.46483e-07
ASV131	Fungi	Ascomycota	Dothideomycetes	Pleosporales	Pleosporaceae	Stemphylium	Stemphylium_vesicarium	1.6736	0.380645	4.78648e-05				-2.98754	0.800179	0.00314254
ASV132	Fungi	Ascomycota	Dothideomycetes	Pleosporales	Didymosphaeriaceae	Paraconiothyrium	NA	-4.00756	0.601161	3.91199e-10										-3.35174	0.724244	0.00015821
ASV133	Fungi	Ascomycota	Dothideomycetes	Capnodiales	Cladosporiaceae	Cladosporium	Cladosporium_fusiforme	-2.90312	0.564889	1.71757e-06
ASV134	Fungi	Basidiomycota	Cystobasidiomycetes	Cystobasidiomycetes_ord_Incertae_sedis	Symmetrosporaceae	Symmetrospora	Symmetrospora_marina	1.91556	0.39539	6.68808e-06
ASV137	Fungi	Ascomycota	Dothideomycetes	Pleosporales	Pleosporaceae	Curvularia	Curvularia_hawaiiensis	-2.53497	0.478317	8.33368e-07
ASV138	Fungi	Ascomycota	Dothideomycetes	Pleosporales	Pleosporaceae	Alternaria	Alternaria_eichhorniae	-1.77743	0.409805	6.05511e-05
ASV139	Fungi	Ascomycota	Dothideomycetes	Capnodiales	Mycosphaerellaceae	Passalora	Passalora_fulva	-2.22463	0.367256	1.47274e-08
ASV14	Fungi	Ascomycota	Dothideomycetes	Capnodiales	Cladosporiaceae	Cladosporium	Cladosporium_sphaerospermum	-2.93413	0.359443	1.56607e-14
ASV140	Fungi	Basidiomycota	Tremellomycetes	Tremellales	NA	NA	NA	-4.58085	0.866833	8.94382e-07				4.4268	1.13234	0.00174542
ASV141	Fungi	Ascomycota	Dothideomycetes	Pleosporales	Periconiaceae	Periconia	NA	1.70599	0.375827	2.59615e-05							-2.42046	0.566783	0.000920893
ASV144	Fungi	Ascomycota	Dothideomycetes	Capnodiales	NA	NA	NA	-2.41464	0.318786	1.15183e-12
ASV145	Fungi	Ascomycota	Dothideomycetes	Pleosporales	Periconiaceae	Periconia	NA	1.00623	0.347157	0.00909721
ASV147	Fungi	Ascomycota	Dothideomycetes	Capnodiales	Mycosphaerellaceae	Passalora	Passalora_fulva	-1.97	0.271677	8.18712e-12				1.69828	0.362245	0.000155987
ASV148	Fungi	Ascomycota	Dothideomycetes	Capnodiales	Mycosphaerellaceae	Passalora	Passalora_fulva	-2.03416	0.370051	3.08544e-07
ASV153	Fungi	Ascomycota	Dothideomycetes	Capnodiales	Mycosphaerellaceae	NA	NA	-4.162	0.555792	2.00424e-12
ASV154	Fungi	Ascomycota	Dothideomycetes	Capnodiales	Capnodiales_fam_Incertae_sedis	Sporidesmajora	Sporidesmajora_pennsylvaniensis	3.9522	0.684747	7.39433e-08
ASV156	Fungi	Ascomycota	Dothideomycetes	Capnodiales	Neodevriesiaceae	Neodevriesia	Neodevriesia_pakbiae	-4.51278	0.514923	1.80619e-16	-5.68389	1.35419	0.000699028
ASV158	Fungi	Basidiomycota	Ustilaginomycetes	Ustilaginales	Ustilaginaceae	Pseudozyma	Pseudozyma_hubeiensis	1.83029	0.585661	0.00479865
ASV159	Fungi	Ascomycota	Dothideomycetes	Pleosporales	Massarinaceae	Stagonospora	NA	-2.75449	0.350134	1.39276e-13
ASV16	Fungi	Ascomycota	Dothideomycetes	Pleosporales	Pleosporaceae	Exserohilum	Exserohilum_rostratum	-2.02859	0.392833	1.57023e-06							-3.09032	0.839096	0.00442778
ASV162	Fungi	Ascomycota	Sordariomycetes	Hypocreales	Hypocreales_fam_Incertae_sedis	Acremonium	Acremonium_breve	-2.4499	0.593608	0.000138946										-2.99514	0.623605	0.000100457
ASV163	Fungi	Ascomycota	Dothideomycetes	Pleosporales	Pleosporaceae	Curvularia	Curvularia_pseudorobusta	1.69846	0.527616	0.00362421
ASV164	Fungi	Basidiomycota	Tremellomycetes	Tremellales	Rhynchogastremataceae	Papiliotrema	NA	-2.13741	0.389745	3.27315e-07				2.78603	0.802167	0.00606602
ASV17	Fungi	Ascomycota	Dothideomycetes	Capnodiales	Mycosphaerellaceae	Phaeophleospora	Phaeophleospora_hymenocallidicola	2.27699	0.37429	1.27583e-08							1.86073	0.506583	0.00442778
ASV171	Fungi	Ascomycota	Dothideomycetes	Pleosporales	Pleosporaceae	NA	NA	-2.60315	0.551271	1.15707e-05
ASV174	Fungi	Ascomycota	Dothideomycetes	Capnodiales	Capnodiaceae	Leptoxyphium	Leptoxyphium_madagascariense	-3.89318	0.894646	5.71291e-05
ASV175	Fungi	Ascomycota	Dothideomycetes	Capnodiales	NA	NA	NA	-2.11611	0.311987	1.88423e-10
ASV176	Fungi	Ascomycota	Dothideomycetes	Capnodiales	NA	NA	NA	5.58589	0.75004	2.42752e-12							3.41748	0.833137	0.00133941
ASV177	Fungi	Ascomycota	Dothideomycetes	Capnodiales	Cladosporiaceae	Cladosporium	NA	-2.98849	0.409274	6.04075e-12
ASV178	Fungi	Basidiomycota	Exobasidiomycetes	Microstromatales	Microstromatales_fam_Incertae_sedis	Jaminaea	Jaminaea_angkorensis	-2.55174	0.716005	0.00114201
ASV182	Fungi	Ascomycota	Dothideomycetes	Capnodiales	NA	NA	NA	-2.45393	0.56739	6.35696e-05
ASV183	Fungi	Basidiomycota	Tremellomycetes	Tremellales	Tremellaceae	Cryptococcus	NA	3.59139	0.664564	4.92743e-07
ASV186	Fungi	Basidiomycota	Exobasidiomycetes	Microstromatales	Microstromatales_fam_Incertae_sedis	Jaminaea	Jaminaea_angkorensis	-2.56937	0.865	0.00737197
ASV187	Fungi	Ascomycota	Dothideomycetes	Pleosporales	Didymosphaeriaceae	Pseudopithomyces	NA	-2.34735	0.493127	9.8445e-06
ASV189	Fungi	Basidiomycota	Agaricostilbomycetes	Agaricostilbales	Agaricostilbaceae	Sterigmatomyces	Sterigmatomyces_halophilus	-1.66093	0.477286	0.00152574
ASV19	Fungi	Ascomycota	Dothideomycetes	Capnodiales	Mycosphaerellaceae	Passalora	Passalora_zambiae	6.38681	0.646627	1.50414e-20				-4.39769	1.32289	0.00964829	2.91598	0.785338	0.00414461
ASV193	Fungi	Ascomycota	Dothideomycetes	Pleosporales	Phaeosphaeriaceae	NA	NA	3.51048	0.68325	1.71757e-06
ASV194	Fungi	Basidiomycota	Pucciniomycetes	Pucciniales	Pucciniaceae	Puccinia	NA	-2.23057	0.558134	0.000232503
ASV196	Fungi	Ascomycota	Dothideomycetes	Pleosporales	Didymellaceae	NA	NA	2.62256	0.623526	0.000103785
ASV199	Fungi	Ascomycota	Dothideomycetes	Capnodiales	Neodevriesiaceae	Neodevriesia	NA	-2.47007	0.563431	5.00032e-05
ASV2	Fungi	Ascomycota	Dothideomycetes	Capnodiales	Mycosphaerellaceae	Passalora	Passalora_fulva	-2.2248	0.245819	1.63527e-17				1.64186	0.360488	0.000185706
ASV202	Fungi	Ascomycota	Dothideomycetes	Capnodiales	Capnodiaceae	Antennariella	Antennariella_placitae				6.00022	1.37134	0.000418105
ASV203	Fungi	Ascomycota	Dothideomycetes	Dothideales	Aureobasidiaceae	Aureobasidium	NA	3.81824	0.774778	4.63691e-06
ASV208	Fungi	Ascomycota	Dothideomycetes	Capnodiales	NA	NA	NA	-1.69112	0.343489	4.70329e-06
ASV209	Fungi	Ascomycota	Dothideomycetes	Capnodiales	Cladosporiaceae	Cladosporium	NA	-2.09908	0.45398	1.82108e-05
ASV21	Fungi	Ascomycota	Dothideomycetes	Pleosporales	Didymosphaeriaceae	NA	NA	1.96336	0.355426	2.68424e-07
ASV212	Fungi	Ascomycota	Dothideomycetes	Capnodiales	Cladosporiaceae	Cladosporium	NA	-2.59853	0.403316	1.49461e-09
ASV213	Fungi	Basidiomycota	Agaricomycetes	Russulales	Wrightoporiaceae	Wrightoporia	Wrightoporia_tropicalis	1.49553	0.357837	0.00011332
ASV214	Fungi	Ascomycota	Dothideomycetes	Capnodiales	NA	NA	NA	-3.03034	0.432877	4.58423e-11
ASV215	Fungi	Ascomycota	Sordariomycetes	Diaporthales	Diaporthaceae	Diaporthe	NA	-3.19571	1.03303	0.00528963
ASV217	Fungi	Ascomycota	Dothideomycetes	Pleosporales	Pleosporaceae	Curvularia	NA	-2.63488	0.619338	8.48954e-05				-4.45739	0.975402	0.000185706
ASV219	Fungi	Ascomycota	Dothideomycetes	Capnodiales	Mycosphaerellaceae	Passalora	Passalora_fulva	-2.24537	0.336909	3.91199e-10
ASV22	Fungi	Basidiomycota	Exobasidiomycetes	Microstromatales	Microstromatales_fam_Incertae_sedis	Jaminaea	Jaminaea_angkorensis										1.4955	0.391906	0.00320282
ASV220	Fungi	Ascomycota	Sordariomycetes	Trichosphaeriales	Trichosphaeriaceae	Nigrospora	NA	-2.48587	0.522976	1.00929e-05
ASV223	Fungi	Ascomycota	Dothideomycetes	Capnodiales	Mycosphaerellaceae	Stenella	Stenella_musae	-1.92387	0.496599	0.000370699
ASV225	Fungi	Ascomycota	Dothideomycetes	Pleosporales	Didymosphaeriaceae	Paraphaeosphaeria	Paraphaeosphaeria_michotii	2.05064	0.364307	1.58016e-07
ASV227	Fungi	Ascomycota	Dothideomycetes	Capnodiales	Mycosphaerellaceae	NA	NA	1.94401	0.621724	0.00479865
ASV230	Fungi	Basidiomycota	Tremellomycetes	Tremellales	NA	NA	NA	-5.19232	0.927413	1.85325e-07
ASV233	Fungi	Ascomycota	Dothideomycetes	Capnodiales	Cladosporiaceae	Cladosporium	NA	-2.80182	0.527381	7.86153e-07										-2.64201	0.742395	0.00870556
ASV235	Fungi	Ascomycota	Dothideomycetes	Pleosporales	Pleosporaceae	Curvularia	Curvularia_tuberculata	-3.34482	0.74732	3.42056e-05
ASV237	Fungi	Ascomycota	Dothideomycetes	Capnodiales	Cladosporiaceae	Cladosporium	NA	-2.48417	0.345194	1.1845e-11
ASV241	Fungi	Ascomycota	Dothideomycetes	Capnodiales	Mycosphaerellaceae	Passalora	Passalora_zambiae	5.31019	0.660795	3.81036e-14
ASV244	Fungi	Ascomycota	Dothideomycetes	Capnodiales	Mycosphaerellaceae	Passalora	Passalora_fulva	-1.99341	0.398933	3.41914e-06
ASV245	Fungi	Ascomycota	Sordariomycetes	Trichosphaeriales	Trichosphaeriaceae	Nigrospora	Nigrospora_oryzae	3.00422	0.626367	8.37411e-06
ASV246	Fungi	Ascomycota	Dothideomycetes	Botryosphaeriales	Aplosporellaceae	Aplosporella	NA	2.00544	0.648563	0.00529029
ASV247	Fungi	Basidiomycota	Exobasidiomycetes	Microstromatales	Quambalariaceae	Quambalaria	Quambalaria_simpsonii	-2.67668	0.517283	1.51038e-06				3.6476	0.894358	0.00106919
ASV25	Fungi	Ascomycota	Dothideomycetes	Pleosporales	Pleosporaceae	Curvularia	Curvularia_hawaiiensis	-1.95874	0.327993	2.3657e-08
ASV251	Fungi	Basidiomycota	Agaricomycetes	Russulales	Peniophoraceae	Peniophora	NA	-1.02108	0.35623	0.00982522
ASV253	Fungi	Ascomycota	Dothideomycetes	Pleosporales	NA	NA	NA	-4.1681	0.65258	2.02505e-09
ASV256	Fungi	Basidiomycota	Microbotryomycetes	Sporidiobolales	Sporidiobolaceae	Rhodosporidiobolus	Rhodosporidiobolus_odoratus	-3.45465	1.13591	0.00599288
ASV258	Fungi	Ascomycota	Dothideomycetes	Capnodiales	Teratosphaeriaceae	NA	NA	-2.59464	0.469545	2.68424e-07
ASV26	Fungi	Ascomycota	Dothideomycetes	Dothideales	Aureobasidiaceae	Aureobasidium	Aureobasidium_pullulans	-2.9824	0.440869	2.07445e-10	5.45732	1.03031	8.13256e-06
ASV262	Fungi	Basidiomycota	Exobasidiomycetes	Exobasidiales	Cryptobasidiaceae	Acaromyces	Acaromyces_ingoldii	-3.60029	0.598889	1.88612e-08
ASV263	Fungi	Ascomycota	Dothideomycetes	NA	NA	NA	NA	1.85232	0.641969	0.00936637
ASV265	Fungi	Ascomycota	Sordariomycetes	Trichosphaeriales	Trichosphaeriaceae	Nigrospora	Nigrospora_oryzae	-1.9661	0.49126	0.000228422
ASV267	Fungi	Ascomycota	Dothideomycetes	Capnodiales	Cladosporiaceae	Cladosporium	NA	-2.11452	0.429079	4.63691e-06
ASV27	Fungi	Ascomycota	Dothideomycetes	Pleosporales	Pleosporaceae	Exserohilum	Exserohilum_rostratum	-2.20655	0.366475	1.8122e-08										2.20061	0.454991	0.000100457
ASV270	Fungi	Ascomycota	Dothideomycetes	Botryosphaeriales	Botryosphaeriaceae	Lasiodiplodia	Lasiodiplodia_crassispora	-2.54483	0.674624	0.000534698
ASV273	Fungi	Ascomycota	Lecanoromycetes	Lecanoromycetes_ord_Incertae_sedis	Micropeltidaceae	NA	NA	4.37603	0.737601	2.95257e-08
ASV274	Fungi	Ascomycota	Dothideomycetes	Capnodiales	Mycosphaerellaceae	Stomiopeltis	NA	3.11556	0.72146	6.50121e-05							3.10031	0.705999	0.000598378
ASV275	Fungi	Basidiomycota	Ustilaginomycetes	Ustilaginales	Ustilaginaceae	Ustilago	Ustilago_affinis	2.07873	0.495352	0.000106047							-2.81588	0.634572	0.000552708
ASV276	Fungi	Basidiomycota	Tremellomycetes	Tremellales	Bulleribasidiaceae	Hannaella	Hannaella_kunmingensis	2.98312	0.649553	2.08052e-05
ASV277	Fungi	Ascomycota	Dothideomycetes	Pleosporales	NA	NA	NA	2.64809	0.488461	4.53613e-07
ASV28	Fungi	Ascomycota	Dothideomycetes	Capnodiales	Mycosphaerellaceae	Phaeophleospora	Phaeophleospora_hymenocallidicola	1.7194	0.376442	2.30741e-05
ASV284	Fungi	Ascomycota	Dothideomycetes	Botryosphaeriales	Botryosphaeriaceae	Lasiodiplodia	Lasiodiplodia_crassispora	-1.84529	0.555888	0.00261851
ASV288	Fungi	Ascomycota	Sordariomycetes	Xylariales	Xylariaceae	NA	NA	2.79435	0.531438	1.00144e-06
ASV289	Fungi	Basidiomycota	Agaricostilbomycetes	Agaricostilbales	NA	NA	NA										7.09028	1.79193	0.00216219
ASV29	Fungi	Ascomycota	Dothideomycetes	Dothideales	Aureobasidiaceae	NA	NA	3.21015	0.575068	1.97908e-07
ASV293	Fungi	Ascomycota	Sordariomycetes	Diaporthales	Diaporthaceae	Diaporthe	NA	1.98596	0.662078	0.00678809
ASV294	Fungi	Ascomycota	Dothideomycetes	Pleosporales	Didymellaceae	Ascochyta	Ascochyta_manawaorae	-1.92045	0.459621	0.00011332
ASV295	Fungi	Basidiomycota	Tremellomycetes	Tremellales	Bulleribasidiaceae	Vishniacozyma	NA	-3.07772	0.631145	5.86037e-06
ASV299	Fungi	Basidiomycota	Exobasidiomycetes	Exobasidiales	Brachybasidiaceae	Meira	Meira_miltonrushii										4.07663	0.971233	0.00102227
ASV3	Fungi	Ascomycota	Dothideomycetes	Capnodiales	Cladosporiaceae	Cladosporium	NA	0.954565	0.214936	3.92753e-05
ASV30	Fungi	Basidiomycota	Exobasidiomycetes	Microstromatales	Microstromatales_fam_Incertae_sedis	Sympodiomycopsis	NA	2.04758	0.43309	1.13459e-05							2.65396	0.58594	0.000418997
ASV301	Fungi	Ascomycota	Dothideomycetes	Botryosphaeriales	Botryosphaeriaceae	Neodeightonia	Neodeightonia_phoenicum	-3.99544	0.834884	8.75139e-06										-4.85449	0.917273	1.55204e-05
ASV305	Fungi	Basidiomycota	Exobasidiomycetes	Exobasidiales	Brachybasidiaceae	Meira	Meira_miltonrushii	2.90524	0.979822	0.00746796
ASV309	Fungi	Ascomycota	Dothideomycetes	Pleosporales	NA	NA	NA	2.03014	0.482606	0.000103785
ASV311	Fungi	Ascomycota	NA	NA	NA	NA	NA	2.71316	0.798927	0.00204771							-5.75602	1.06891	6.16005e-06
ASV32	Fungi	Ascomycota	Sordariomycetes	Trichosphaeriales	Trichosphaeriaceae	Nigrospora	NA	-2.38567	0.464218	1.71757e-06				-2.43716	0.597295	0.00106919	-3.80408	1.0006	0.00321318
ASV320	Fungi	Ascomycota	NA	NA	NA	NA	NA	2.5605	0.479303	6.77161e-07
ASV324	Fungi	Ascomycota	Dothideomycetes	Dothideales	Dothideales_fam_Incertae_sedis	Hortaea	Hortaea_werneckii	-1.71758	0.585432	0.00815659
ASV327	Fungi	Ascomycota	NA	NA	NA	NA	NA	-2.28485	0.718587	0.00409609
ASV328	Fungi	Basidiomycota	Cystobasidiomycetes	Erythrobasidiales	Erythrobasidiaceae	Erythrobasidium	NA	2.73391	0.846264	0.00351008
ASV331	Fungi	Ascomycota	Dothideomycetes	Pleosporales	Massarinaceae	Stagonospora	NA	1.58156	0.507354	0.00490461
ASV332	Fungi	Ascomycota	Dothideomycetes	Pleosporales	Didymellaceae	Ascochyta	Ascochyta_manawaorae	3.58288	0.722859	4.08532e-06
ASV334	Fungi	Ascomycota	Dothideomycetes	Capnodiales	Neodevriesiaceae	NA	NA	-2.72923	0.529933	1.66289e-06
ASV336	Fungi	Ascomycota	Dothideomycetes	Capnodiales	Dissoconiaceae	Uwebraunia	Uwebraunia_musae	-4.41811	0.914939	7.17798e-06
ASV339	Fungi	Ascomycota	Dothideomycetes	Pleosporales	Periconiaceae	Periconia	Periconia_digitata	2.95725	0.596254	4.05915e-06
ASV342	Fungi	Ascomycota	Dothideomycetes	Pleosporales	Cucurbitariaceae	Pyrenochaeta	NA	-3.94298	0.813064	6.58881e-06
ASV344	Fungi	Ascomycota	Dothideomycetes	Pleosporales	Didymellaceae	Ascochyta	Ascochyta_manawaorae	-1.44687	0.477477	0.00616277
ASV345	Fungi	Ascomycota	Dothideomycetes	Capnodiales	NA	NA	NA	-4.0535	0.61575	6.1638e-10
ASV346	Fungi	Ascomycota	Dothideomycetes	Capnodiales	NA	NA	NA	2.65366	0.582248	2.39921e-05
ASV349	Fungi	Basidiomycota	Agaricomycetes	Agaricales	NA	NA	NA	-2.03	0.601746	0.00219967
ASV35	Fungi	Basidiomycota	Tremellomycetes	Tremellales	NA	NA	NA	-5.44663	0.946503	7.93218e-08
ASV357	Fungi	Ascomycota	Dothideomycetes	Pleosporales	Phaeosphaeriaceae	Phaeosphaeria	NA	3.00485	0.52766	1.09346e-07
ASV36	Fungi	Basidiomycota	Tremellomycetes	Tremellales	NA	NA	NA	-2.93184	0.70433	0.000119818				4.01093	1.12173	0.0043787
ASV361	Fungi	Basidiomycota	Tremellomycetes	Tremellales	Bulleribasidiaceae	Vishniacozyma	Vishniacozyma_heimaeyensis	2.42281	0.750166	0.00351008
ASV365	Fungi	Ascomycota	Sordariomycetes	Xylariales	Xylariaceae	NA	NA	-4.0574	1.08321	0.000587704										-5.54109	1.22657	0.000229683
ASV366	Fungi	Ascomycota	Dothideomycetes	Pleosporales	NA	NA	NA	-2.75778	0.562698	5.22165e-06
ASV37	Fungi	Ascomycota	Sordariomycetes	Trichosphaeriales	Trichosphaeriaceae	Nigrospora	NA	-2.28635	0.440234	1.37996e-06	-4.52066	0.724399	9.02511e-08	-3.08776	0.580803	1.4979e-05	-2.96309	0.765122	0.0026908
ASV371	Fungi	Ascomycota	Lecanoromycetes	NA	NA	NA	NA	3.75892	0.722918	1.35068e-06
ASV38	Fungi	Basidiomycota	Pucciniomycetes	Pucciniales	Pucciniaceae	Puccinia	NA							-2.34599	0.638528	0.00355587	-6.68512	0.785724	7.5057e-15
ASV382	Fungi	Ascomycota	Sordariomycetes	Xylariales	Xylariales_fam_Incertae_sedis	Robillarda	Robillarda_sessilis	-3.45445	0.763416	2.73464e-05
ASV386	Fungi	Ascomycota	Dothideomycetes	Capnodiales	Mycosphaerellaceae	Passalora	Passalora_zambiae	4.50092	0.886602	2.33004e-06
ASV389	Fungi	Ascomycota	Dothideomycetes	Pleosporales	Didymellaceae	NA	NA	-3.21265	0.947527	0.00207802
ASV39	Fungi	Ascomycota	Dothideomycetes	Capnodiales	Cladosporiaceae	Cladosporium	Cladosporium_sphaerospermum	-3.25456	0.515519	3.20806e-09
ASV390	Fungi	Basidiomycota	Tremellomycetes	Tremellales	Bulleribasidiaceae	Hannaella	Hannaella_kunmingensis	2.18921	0.716062	0.00581116
ASV392	Fungi	Ascomycota	Sordariomycetes	Hypocreales	NA	NA	NA	-2.32357	0.571735	0.000180062
ASV396	Fungi	Basidiomycota	Agaricomycetes	Polyporales	Coriolaceae	Trametes	Trametes_socotrana	-1.38039	0.411654	0.00235495
ASV397	Fungi	Ascomycota	Dothideomycetes	Tubeufiales	Tubeufiaceae	Helicoma	NA	-3.19086	0.885205	0.0009875
ASV399	Fungi	Ascomycota	Sordariomycetes	Xylariales	Diatrypaceae	Eutypella	Eutypella_cryptovalsoidea	-2.4947	0.622178	0.000224159
ASV4	Fungi	Ascomycota	Dothideomycetes	Capnodiales	Cladosporiaceae	Cladosporium	NA	-2.46897	0.284256	3.09137e-16				1.65027	0.485141	0.00758253
ASV412	Fungi	Ascomycota	Dothideomycetes	Pleosporales	NA	NA	NA	-3.55013	0.949569	0.000600971
ASV414	Fungi	Ascomycota	Sordariomycetes	Xylariales	Xylariales_fam_Incertae_sedis	Dicyma	Dicyma_funiculosa	-1.97396	0.640852	0.00545591
ASV419	Fungi	Ascomycota	Dothideomycetes	Capnodiales	Teratosphaeriaceae	Devriesia	Devriesia_strelitziicola	2.78549	0.650469	7.59777e-05
ASV421	Fungi	Ascomycota	Dothideomycetes	Pleosporales	Pleosporaceae	Curvularia	Curvularia_lunata	-2.76427	0.963116	0.00974881
ASV423	Fungi	Basidiomycota	Cystobasidiomycetes	Cystobasidiomycetes_ord_Incertae_sedis	Symmetrosporaceae	Symmetrospora	Symmetrospora_marina	-3.25253	0.743935	5.24217e-05
ASV424	Fungi	Ascomycota	Dothideomycetes	Pleosporales	Coniothyriaceae	Coniothyrium	Coniothyrium_multiporum	-2.99243	0.956548	0.00479865
ASV425	Fungi	Ascomycota	Dothideomycetes	Botryosphaeriales	Botryosphaeriaceae	Neofusicoccum	NA	-3.53762	0.993145	0.00114375
ASV427	Fungi	Ascomycota	Lecanoromycetes	Lecanorales	NA	NA	NA	2.43392	0.627993	0.000370492
ASV43	Fungi	Ascomycota	Dothideomycetes	Capnodiales	Cladosporiaceae	Cladosporium	Cladosporium_sphaerospermum	-2.58608	0.300963	6.10625e-16	3.42232	0.798118	0.000533152
ASV430	Fungi	Ascomycota	Dothideomycetes	Capnodiales	Neodevriesiaceae	Neodevriesia	Neodevriesia_lagerstroemiae	-3.8348	0.789819	6.46021e-06
ASV440	Fungi	Ascomycota	Dothideomycetes	Capnodiales	Neodevriesiaceae	Neodevriesia	NA	-3.42697	0.873985	0.000310971
ASV442	Fungi	Ascomycota	Dothideomycetes	Capnodiales	Cladosporiaceae	Cladosporium	Cladosporium_sphaerospermum	-3.14063	0.577857	4.25878e-07
ASV446	Fungi	Basidiomycota	Exobasidiomycetes	Microstromatales	Microstromatales_fam_Incertae_sedis	Sympodiomycopsis	NA	-3.54433	1.00955	0.00137377
ASV45	Fungi	Ascomycota	Dothideomycetes	Dothideales	Aureobasidiaceae	Aureobasidium	Aureobasidium_pullulans	4.93315	0.649644	1.05219e-12
ASV450	Fungi	Basidiomycota	Agaricomycetes	Russulales	Peniophoraceae	Peniophora	NA	1.74446	0.525355	0.00261851
ASV455	Fungi	Ascomycota	Sordariomycetes	Trichosphaeriales	Trichosphaeriaceae	Nigrospora	Nigrospora_oryzae	2.47189	0.854188	0.00919412
ASV458	Fungi	Ascomycota	Dothideomycetes	Pleosporales	Lentitheciaceae	NA	NA	1.99398	0.527931	0.000527643
ASV461	Fungi	Basidiomycota	Agaricomycetes	Polyporales	Meruliaceae	Porostereum	Porostereum_spadiceum	1.53515	0.502485	0.00582681
ASV462	Fungi	Ascomycota	Sordariomycetes	Trichosphaeriales	Trichosphaeriaceae	Nigrospora	Nigrospora_oryzae	-2.2724	0.744433	0.00585126
ASV465	Fungi	Ascomycota	Dothideomycetes	Pleosporales	Didymellaceae	Ascochyta	Ascochyta_manawaorae	-2.95456	0.572259	1.57023e-06
ASV47	Fungi	Basidiomycota	Pucciniomycetes	Pucciniales	Pucciniaceae	Puccinia	NA	1.4605	0.419632	0.00152574				-3.51965	0.779838	0.000200693	-6.15728	0.78076	4.41108e-13
ASV470	Fungi	Ascomycota	Dothideomycetes	Pleosporales	Periconiaceae	Periconia	Periconia_variicolor													-4.42135	1.1614	0.00401825
ASV477	Fungi	Basidiomycota	Agaricomycetes	Polyporales	Polyporaceae	Favolus	Favolus_grammocephalus	2.31197	0.57754	0.000228422
ASV479	Fungi	Ascomycota	Dothideomycetes	Pleosporales	Sporormiaceae	Preussia	Preussia_terricola	-3.40658	1.12266	0.00610537
ASV480	Fungi	Basidiomycota	Agaricomycetes	Agaricales	Psathyrellaceae	Psathyrella	NA										4.72263	1.12663	0.00102227
ASV482	Fungi	Basidiomycota	Pucciniomycetes	Pucciniales	Pucciniaceae	Puccinia	NA	3.00375	0.972781	0.00534309							-4.67022	1.31954	0.00682091
ASV483	Fungi	Ascomycota	Sordariomycetes	Trichosphaeriales	Trichosphaeriaceae	Nigrospora	NA	-1.99125	0.64987	0.00570674
ASV484	Fungi	Ascomycota	Dothideomycetes	Capnodiales	Neodevriesiaceae	NA	NA	2.29118	0.548698	0.000113891
ASV488	Fungi	Basidiomycota	Exobasidiomycetes	Exobasidiales	Brachybasidiaceae	Meira	Meira_argovae	4.34681	0.826835	1.00144e-06							3.63036	1.05501	0.00833466
ASV494	Fungi	Basidiomycota	Exobasidiomycetes	Microstromatales	Microstromatales_fam_Incertae_sedis	Sympodiomycopsis	NA	-3.32089	0.872314	0.000470264
ASV496	Fungi	Ascomycota	Dothideomycetes	Pleosporales	Coniothyriaceae	Camarosporium	NA	-3.4773	0.828461	0.000106047
ASV5	Fungi	Ascomycota	Dothideomycetes	Pleosporales	Pleosporaceae	Alternaria	NA	-1.23296	0.196823	4.222e-09							-2.13229	0.56933	0.00382924
ASV52	Fungi	Ascomycota	Dothideomycetes	Pleosporales	Pleosporaceae	Curvularia	NA	-2.00734	0.433641	1.79023e-05							-4.17847	1.19381	0.00760209
ASV524	Fungi	Basidiomycota	Ustilaginomycetes	Ustilaginales	Ustilaginaceae	Sporisorium	Sporisorium_scitamineum	2.63355	0.786621	0.00238855
ASV53	Fungi	Ascomycota	Dothideomycetes	Dothideales	Aureobasidiaceae	Aureobasidium	Aureobasidium_thailandense	4.3142	0.579493	2.42752e-12
ASV530	Fungi	Basidiomycota	Cystobasidiomycetes	Cystobasidiomycetes_ord_Incertae_sedis	Symmetrosporaceae	Symmetrospora	Symmetrospora_marina	-2.61388	0.75255	0.00155546
ASV54	Fungi	Ascomycota	Dothideomycetes	Capnodiales	Mycosphaerellaceae	Stomiopeltis	NA	4.14388	0.627424	5.45706e-10							2.89014	0.731301	0.00216219
ASV543	Fungi	Ascomycota	Saccharomycetes	Saccharomycetales	Debaryomycetaceae	Debaryomyces	Debaryomyces_hansenii	3.21217	1.11162	0.00927915
ASV546	Fungi	Ascomycota	Dothideomycetes	Pleosporales	NA	NA	NA	3.10897	0.755086	0.00014402
ASV547	Fungi	Ascomycota	Dothideomycetes	Strigulales	Strigulaceae	Strigula	Strigula_melanobapha	2.3478	0.645916	0.000883654
ASV55	Fungi	Basidiomycota	Pucciniomycetes	Pucciniales	Pucciniaceae	Puccinia	NA										-6.95702	0.852621	7.14448e-14
ASV551	Fungi	Basidiomycota	Agaricomycetes	Agaricales	Psathyrellaceae	Parasola	NA	-2.93007	0.794139	0.000721447
ASV556	Fungi	Ascomycota	Dothideomycetes	Pleosporales	Didymellaceae	NA	NA	3.19198	1.01169	0.00443548
ASV56	Fungi	Ascomycota	Sordariomycetes	Trichosphaeriales	Trichosphaeriaceae	Nigrospora	Nigrospora_oryzae	3.07719	0.489385	3.70141e-09
ASV564	Fungi	Ascomycota	Dothideomycetes	Dothideales	NA	NA	NA	-2.98447	0.774364	0.000399956
ASV57	Fungi	Basidiomycota	Exobasidiomycetes	Exobasidiales	Brachybasidiaceae	Meira	Meira_argovae	-5.18567	0.623495	5.18325e-15	-6.79257	1.36591	3.41293e-05
ASV571	Fungi	Ascomycota	Dothideomycetes	Capnodiales	Cladosporiaceae	Toxicocladosporium	Toxicocladosporium_irritans	-2.51466	0.770594	0.00316638
ASV575	Fungi	Ascomycota	NA	NA	NA	NA	NA	2.63268	0.731194	0.000997835
ASV58	Fungi	Basidiomycota	Tremellomycetes	Tremellales	Bulleribasidiaceae	Vishniacozyma	Vishniacozyma_taibaiensis	-4.27609	0.45386	6.38675e-19				3.25753	0.693485	0.000155987
ASV586	Fungi	Ascomycota	Dothideomycetes	Dothideales	Dothioraceae	Pseudoseptoria	Pseudoseptoria_obscura	2.53679	0.666079	0.000470046
ASV59	Fungi	Ascomycota	Sordariomycetes	Trichosphaeriales	Trichosphaeriaceae	Nigrospora	Nigrospora_oryzae	2.78935	0.405178	9.82385e-11				-2.37166	0.664179	0.0043787
ASV590	Fungi	Ascomycota	NA	NA	NA	NA	NA	-2.95415	0.968754	0.00588536
ASV597	Fungi	Ascomycota	Dothideomycetes	Pleosporales	Biatriosporaceae	Biatriospora	NA	1.84411	0.618442	0.00715198
ASV60	Fungi	Basidiomycota	Exobasidiomycetes	Microstromatales	Microstromatales_fam_Incertae_sedis	Sympodiomycopsis	Sympodiomycopsis_paphiopedili	-3.11586	0.541928	8.03809e-08	-5.63383	1.28151	0.000418105
ASV609	Fungi	Basidiomycota	Exobasidiomycetes	Exobasidiales	Exobasidiaceae	Exobasidium	NA	-3.31355	0.890596	0.000642037
ASV611	Fungi	Ascomycota	Eurotiomycetes	Eurotiales	Trichocomaceae	Thermomyces	Thermomyces_lanuginosus	-2.61137	0.672558	0.000362136
ASV613	Fungi	Basidiomycota	Cystobasidiomycetes	Cystobasidiomycetes_ord_Incertae_sedis	Symmetrosporaceae	Symmetrospora	Symmetrospora_marina	2.26769	0.661748	0.00183846
ASV620	Fungi	Basidiomycota	Exobasidiomycetes	Exobasidiales	Brachybasidiaceae	Meira	Meira_argovae	3.48029	1.05551	0.00282096
ASV621	Fungi	Basidiomycota	Microbotryomycetes	Sporidiobolales	Sporidiobolaceae	Rhodotorula	NA	-2.78721	0.934997	0.00715198
ASV626	Fungi	Ascomycota	Eurotiomycetes	Eurotiales	Aspergillaceae	Aspergillus	Aspergillus_niger	-2.50273	0.570363	4.94652e-05
ASV627	Fungi	Ascomycota	Dothideomycetes	Pleosporales	Pleosporaceae	Exserohilum	Exserohilum_rostratum	-2.23802	0.586684	0.000463927
ASV629	Fungi	Ascomycota	Dothideomycetes	Capnodiales	Teratosphaeriaceae	NA	NA	-2.74447	0.553032	4.04007e-06
ASV63	Fungi	Basidiomycota	Microbotryomycetes	Sporidiobolales	Sporidiobolaceae	Rhodosporidiobolus	Rhodosporidiobolus_odoratus	-5.51571	0.798983	8.84538e-11
ASV630	Fungi	Ascomycota	Dothideomycetes	Capnodiales	Mycosphaerellaceae	Mycosphaerella	NA	-2.72957	0.865942	0.00445908
ASV639	Fungi	Basidiomycota	Agaricomycetes	Hymenochaetales	Schizoporaceae	Hyphodontia	Hyphodontia_niemelaei	1.57143	0.515904	0.00592712
ASV65	Fungi	Ascomycota	Dothideomycetes	Capnodiales	Cladosporiaceae	Cladosporium	NA	-2.75783	0.330544	4.61589e-15
ASV655	Fungi	Ascomycota	Dothideomycetes	Capnodiales	Neodevriesiaceae	Neodevriesia	Neodevriesia_pakbiae	-2.81474	0.917709	0.00567435
ASV657	Fungi	Basidiomycota	Agaricomycetes	Agaricales	Pleurotaceae	Hohenbuehelia	Hohenbuehelia_portegna										4.35489	1.10523	0.00216219
ASV66	Fungi	Ascomycota	Sordariomycetes	Trichosphaeriales	Trichosphaeriaceae	Nigrospora	NA	2.9596	0.461878	1.8066e-09				-3.68182	1.01134	0.00384456
ASV661	Fungi	Ascomycota	Dothideomycetes	Capnodiales	Mycosphaerellaceae	Passalora	Passalora_fulva	-2.16013	0.425567	2.33004e-06
ASV662	Fungi	Basidiomycota	Pucciniomycetes	Septobasidiales	Septobasidiaceae	Septobasidium	Septobasidium_pallidum	-2.36873	0.800407	0.00757398
ASV666	Fungi	Basidiomycota	Microbotryomycetes	Sporidiobolales	Sporidiobolaceae	Sporobolomyces	Sporobolomyces_phaffii	-2.32231	0.807574	0.00961965
ASV68	Fungi	Ascomycota	Dothideomycetes	Dothideales	Dothideales_fam_Incertae_sedis	Hortaea	Hortaea_werneckii	-1.5111	0.333681	2.71011e-05							-2.21935	0.645734	0.00833466
ASV683	Fungi	Basidiomycota	Agaricomycetes	Russulales	Auriscalpiaceae	Lentinellus	NA	2.50791	0.71211	0.00132504
ASV69	Fungi	Ascomycota	Dothideomycetes	Pleosporales	Didymellaceae	Ascochyta	Ascochyta_manawaorae	1.51218	0.339334	3.71663e-05
ASV7	Fungi	Ascomycota	Dothideomycetes	Pleosporales	Didymellaceae	NA	NA	4.00997	0.534643	1.92719e-12							-2.50937	0.600005	0.00102227
ASV703	Fungi	Ascomycota	Dothideomycetes	Capnodiales	Mycosphaerellaceae	Zasmidium	Zasmidium_angulare	-3.69935	1.18376	0.00479865
ASV72	Fungi	Ascomycota	Dothideomycetes	Capnodiales	Capnodiaceae	NA	NA	-4.67738	0.726315	1.49461e-09	3.53784	0.935153	0.00356145	5.12253	1.02526	5.51206e-05				4.35984	0.931678	0.000147771
ASV728	Fungi	Ascomycota	Dothideomycetes	Capnodiales	NA	NA	NA	-2.84718	0.720054	0.000274349
ASV73	Fungi	Ascomycota	Sordariomycetes	Trichosphaeriales	Trichosphaeriaceae	Nigrospora	Nigrospora_oryzae	2.56378	0.442587	6.63723e-08
ASV75	Fungi	Basidiomycota	Tremellomycetes	Tremellales	Bulleribasidiaceae	Vishniacozyma	Vishniacozyma_taibaiensis	-2.85161	0.391466	6.63283e-12				2.20882	0.598187	0.00349094
ASV750	Fungi	Basidiomycota	Tremellomycetes	Tremellales	Trimorphomycetaceae	Trimorphomyces	NA	2.95191	0.924712	0.00394624
ASV76	Fungi	Basidiomycota	Cystobasidiomycetes	Cystobasidiomycetes_ord_Incertae_sedis	Symmetrosporaceae	Symmetrospora	Symmetrospora_marina	-2.27397	0.572599	0.000256878
ASV763	Fungi	Ascomycota	Sordariomycetes	Hypocreales	NA	NA	NA	-2.62409	0.810318	0.00343934
ASV782	Fungi	Ascomycota	Eurotiomycetes	Chaetothyriales	Cyphellophoraceae	Cyphellophora	Cyphellophora_oxyspora	-2.10588	0.713269	0.00771422
ASV8	Fungi	Ascomycota	Dothideomycetes	Dothideales	Aureobasidiaceae	Aureobasidium	Aureobasidium_namibiae	3.65153	0.515767	2.67738e-11
ASV81	Fungi	Ascomycota	Dothideomycetes	Pleosporales	Didymellaceae	Stagonosporopsis	Stagonosporopsis_dennisii	2.42444	0.395379	9.59991e-09
ASV82	Fungi	Ascomycota	Dothideomycetes	Pleosporales	Pleosporaceae	Bipolaris	Bipolaris_cynodontis	-2.50811	0.477075	1.00144e-06
ASV83	Fungi	Ascomycota	Dothideomycetes	Pleosporales	Pleosporaceae	Curvularia	Curvularia_verruculosa	-1.66512	0.362243	2.0567e-05				-2.36188	0.588426	0.00130021	-2.91106	0.79609	0.00452432
ASV84	Fungi	Ascomycota	Dothideomycetes	Pleosporales	Periconiaceae	Periconia	Periconia_digitata	1.4863	0.295305	2.86085e-06	3.36234	0.916534	0.00388426
ASV86	Fungi	Ascomycota	Dothideomycetes	Capnodiales	Mycosphaerellaceae	Phaeophleospora	NA							-2.55785	0.674266	0.00262698
ASV866	Fungi	Ascomycota	Dothideomycetes	Capnodiales	Mycosphaerellaceae	NA	NA	-1.94828	0.680736	0.00992005
ASV87	Fungi	Ascomycota	NA	NA	NA	NA	NA	-4.94022	0.747728	5.45706e-10				4.34509	1.10645	0.00173827
ASV89	Fungi	Ascomycota	Sordariomycetes	Hypocreales	Nectriaceae	Gibberella	Gibberella_intricans	-2.01001	0.295712	1.75262e-10										-1.58768	0.368289	0.000522199
ASV9	Fungi	Ascomycota	Dothideomycetes	Capnodiales	Cladosporiaceae	Cladosporium	Cladosporium_dominicanum	-2.97853	0.29872	1.1744e-20	3.05151	0.831604	0.00388426
ASV90	Fungi	Ascomycota	Dothideomycetes	Capnodiales	NA	NA	NA	-3.74763	0.509409	4.51195e-12	-3.58228	0.969572	0.00388426
ASV91	Fungi	Basidiomycota	Ustilaginomycetes	Ustilaginales	Ustilaginaceae	Ustilago	Ustilago_xerochloae	3.71843	0.69031	5.36149e-07							-3.85133	0.664097	7.0735e-07
ASV93	Fungi	Ascomycota	Dothideomycetes	Pleosporales	Pleosporaceae	NA	NA	-1.3941	0.354051	0.000292145
ASV95	Fungi	Ascomycota	Sordariomycetes	Trichosphaeriales	Trichosphaeriaceae	Nigrospora	Nigrospora_oryzae	2.59835	0.451035	7.76156e-08							-1.75866	0.510414	0.00833466
ASV96	Fungi	Ascomycota	Sordariomycetes	Trichosphaeriales	Trichosphaeriaceae	Nigrospora	Nigrospora_oryzae	-1.99172	0.522744	0.000469779	-5.55278	0.962471	8.23903e-07	-3.7191	0.638004	1.57554e-06
ASV97	Fungi	Ascomycota	Dothideomycetes	Pleosporales	Pleosporaceae	Curvularia	Curvularia_clavata							-2.39114	0.659024	0.00384456
ASV978	Fungi	Ascomycota	Dothideomycetes	Capnodiales	Cladosporiaceae	Cladosporium	NA	-2.49823	0.615877	0.000184886
ASV98	Fungi	Basidiomycota	Tremellomycetes	Tremellales	Rhynchogastremataceae	Papiliotrema	Papiliotrema_terrestris	-3.92165	0.700805	1.85578e-07
